# Supplementary figures and images for: Enhancing thermal transport in TKX-50 energetic materials: the role of graphene orientation and molecular interactions
Source: Royal Society of Chemistry journal article supplement (doi:10.1039/d5cp02663f), 2025-01-01

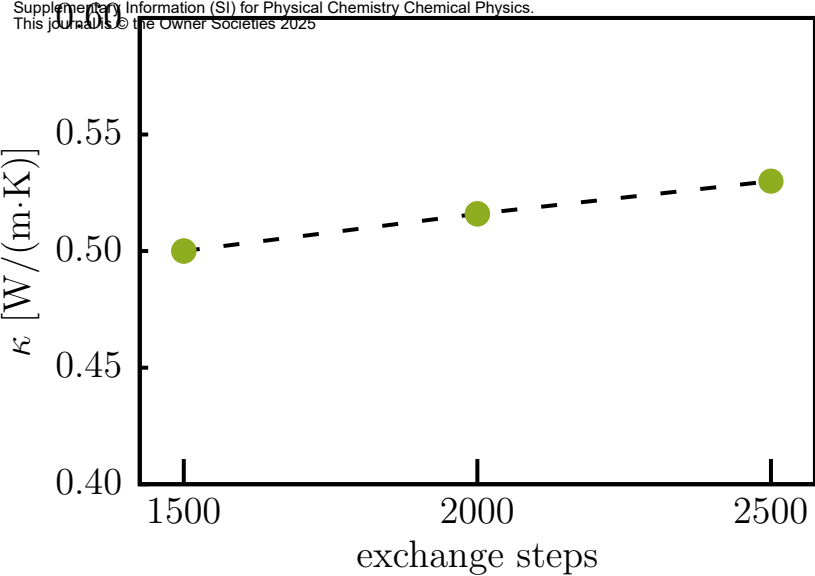

Supplement: d5cp02663f16.pdf [file d5cp02663f16.pdf]

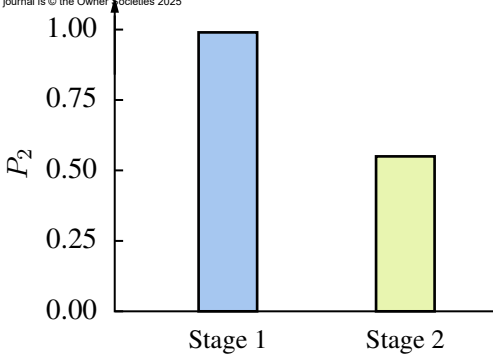

Supplement: d5cp02663f17.pdf [file d5cp02663f17.pdf]

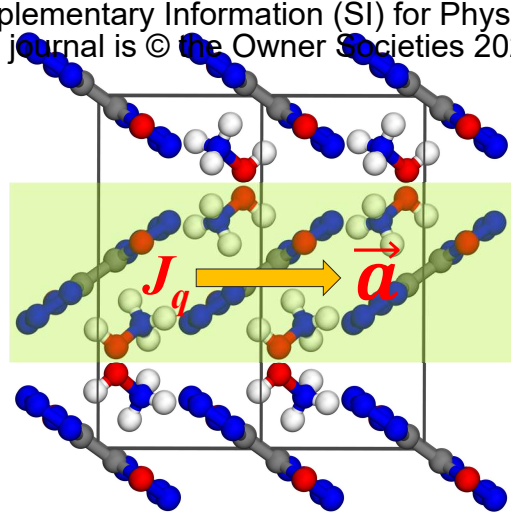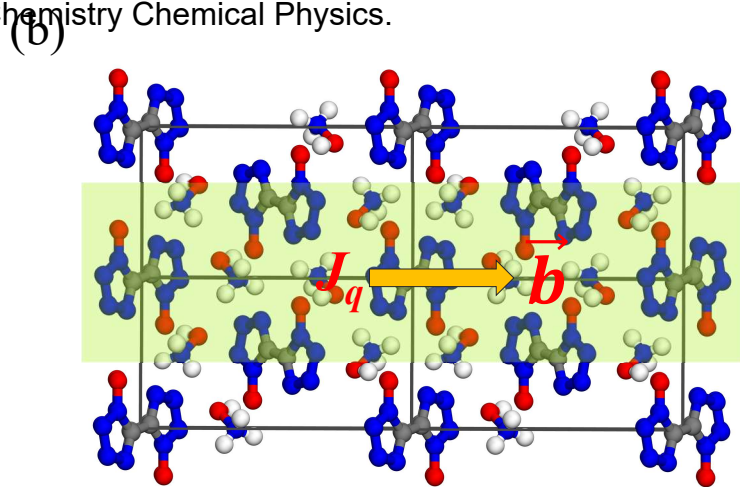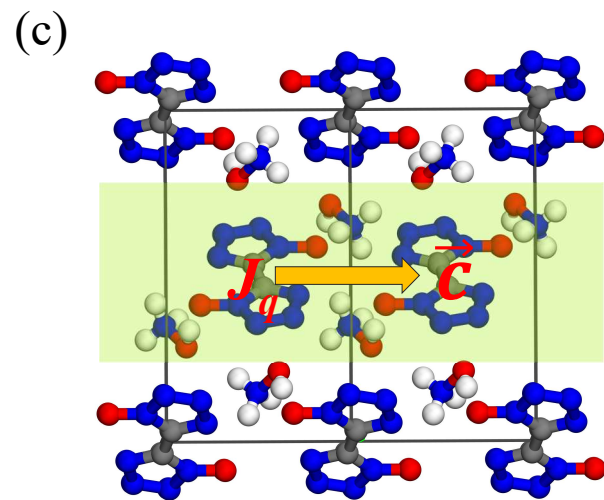

Supplement: d5cp02663f19.pdf [file d5cp02663f19.pdf]

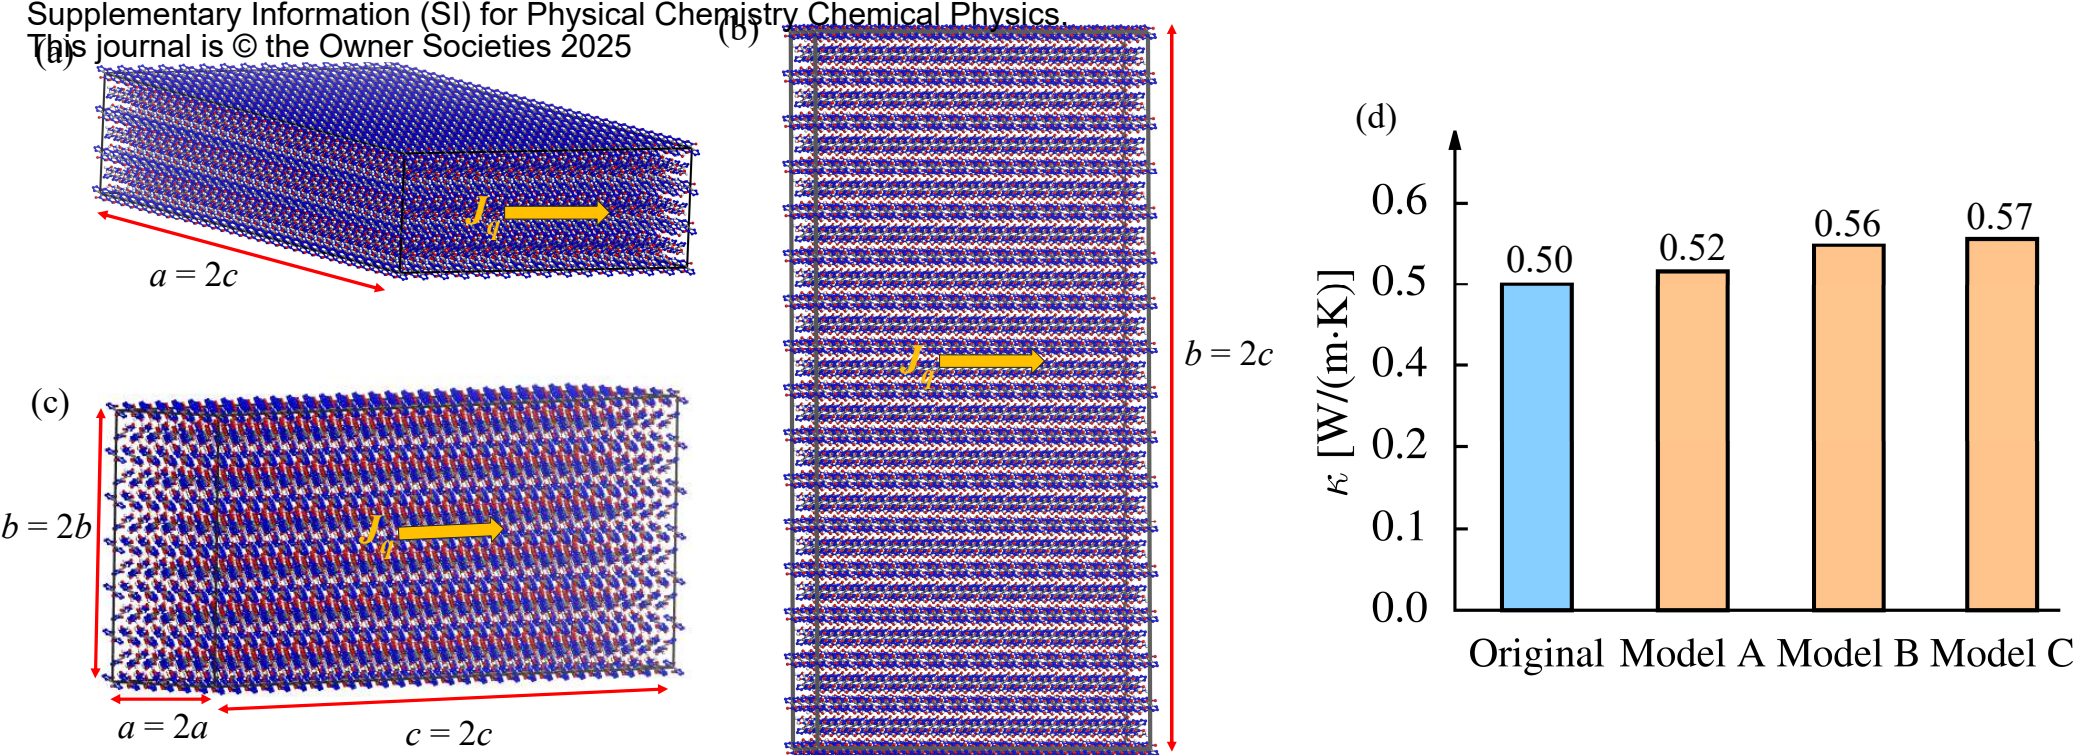

Supplement: d5cp02663f4.pdf [file d5cp02663f4.pdf]

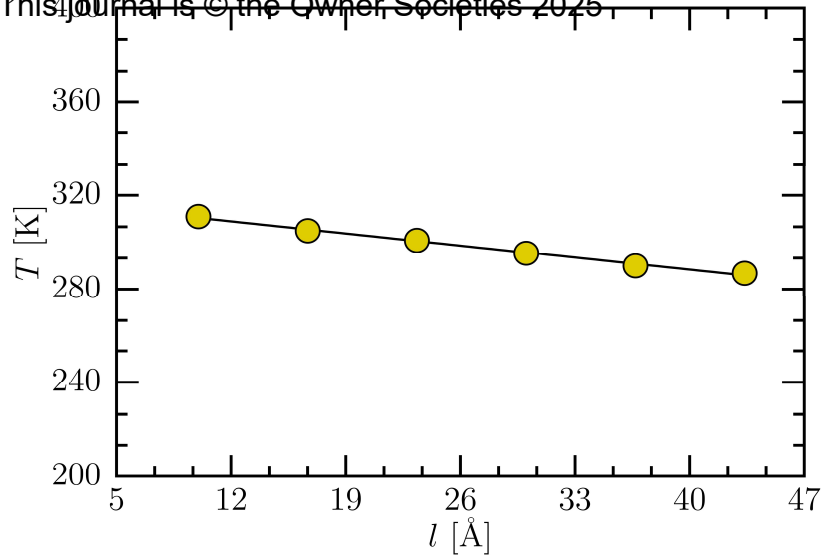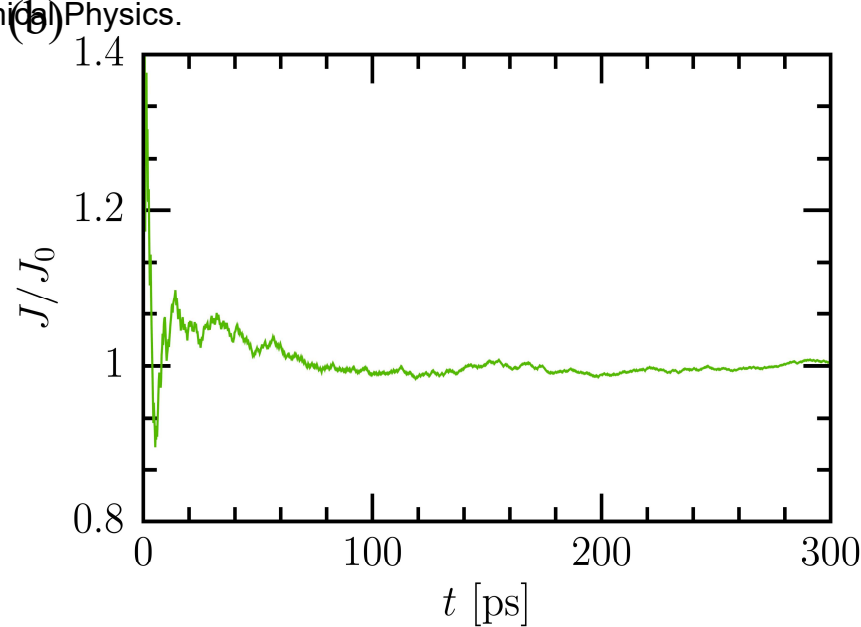

Supplement: d5cp02663f5.pdf [file d5cp02663f5.pdf]
